# Supplementary material for: Long-term trend and variability of atmospheric PM 10 concentration in the Po Valley
Source: Copernicus journal article supplement (doi:10.5194/acp-14-4895-2014), 2014-05-20
Supplement: Supplementary file 1 [file acp-14-4895-2014-supplement.zip]

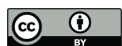

## *Supplement of*

# **Long-term trend and variability of atmospheric PM<sub>10</sub> concentration in the Po Valley**

**A. Bigi and G. Ghermandi**

*Correspondence to:* A. Bigi ([alessandro.bigi@unimore.it](mailto:alessandro.bigi@unimore.it))

- Supplement-Cover-Letter.pdf
- supplementary\_material\_revised.pdf
- supplementary\_material\_revised.tex
