# Supplementary material for: Long-term trend and variability of atmospheric PM 10 concentration in the Po Valley
Source: Copernicus journal article supplement (doi:10.5194/acp-14-4895-2014), 2014-05-20
Supplement: Supplementary file 2 [file acp-14-4895-2014-supplement.zip]

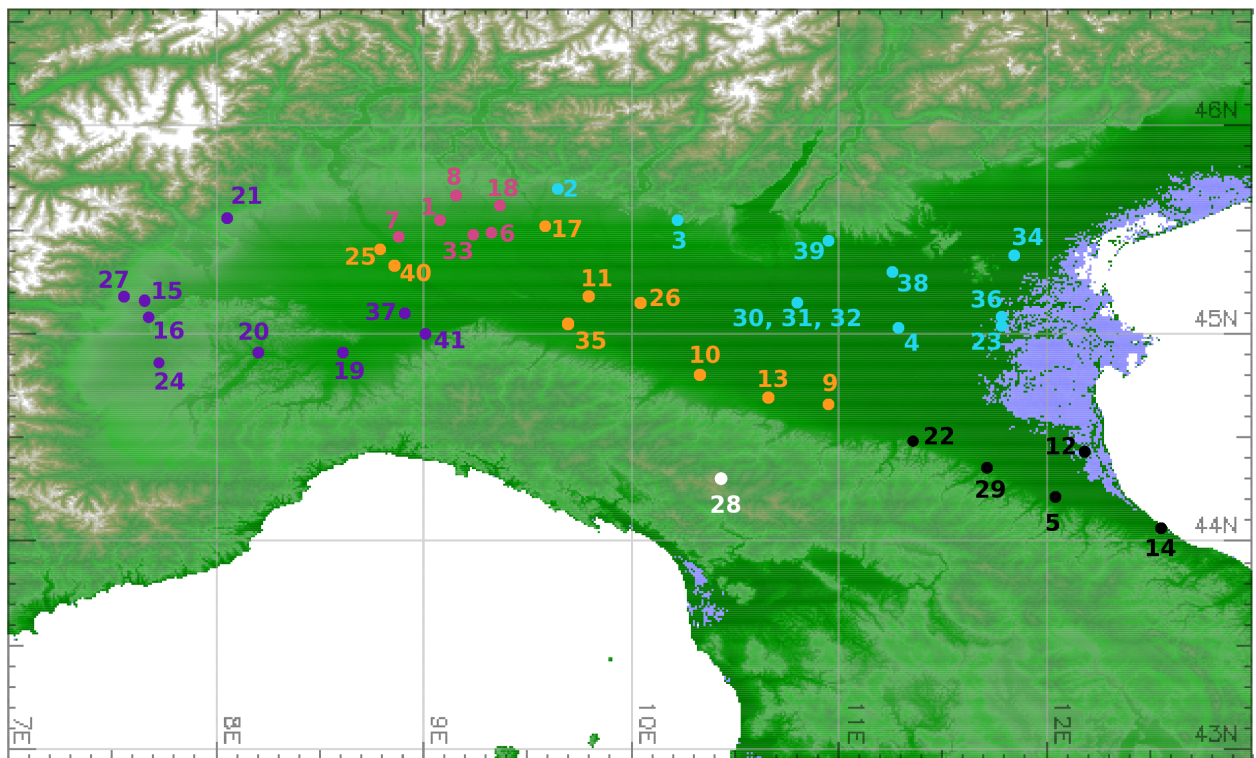

Figure S1: Map result for cluster analysis using Pearson-correlation-based distance. Key for ID number is found in Table 1, colour code in Fig. 5b.

## Complete series

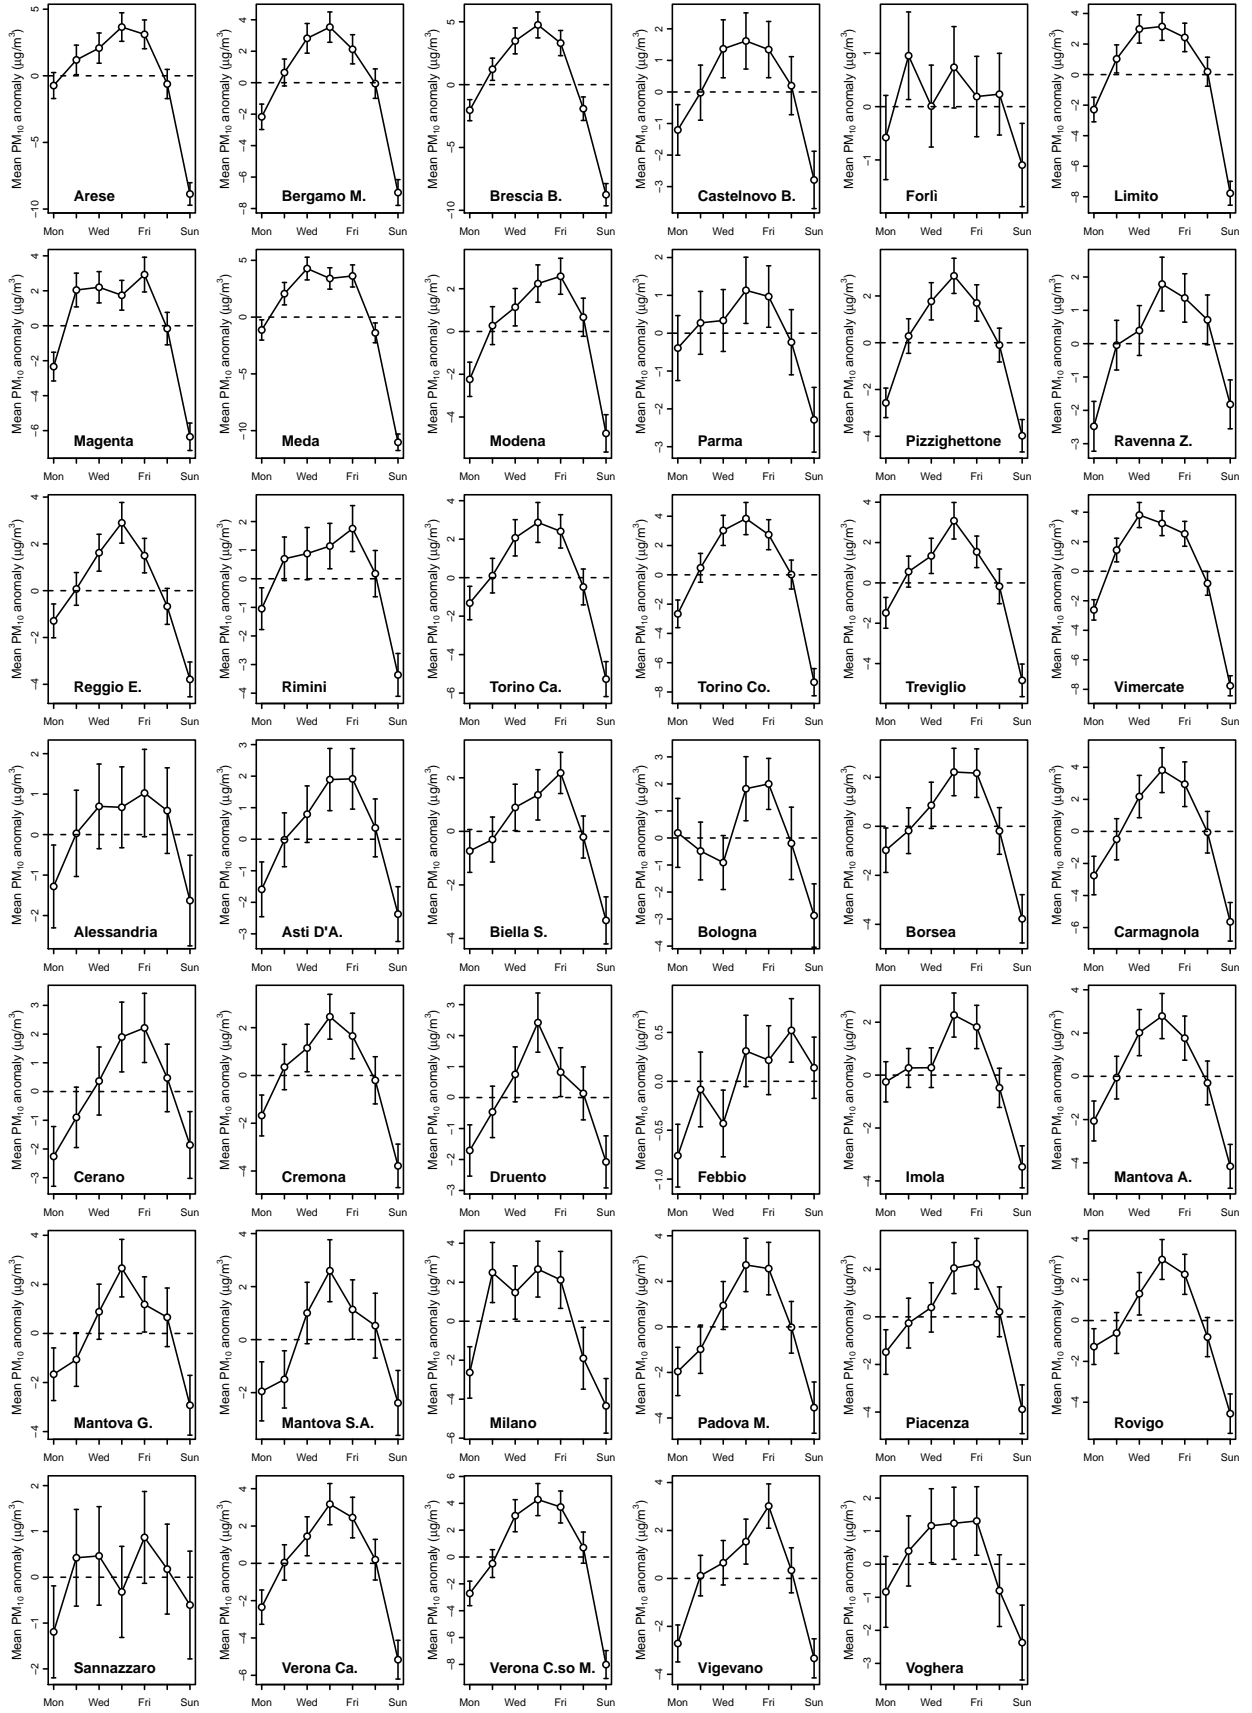

Figure S2: 7 day week mean  $PM_{10}$  anomaly for all sites listed in table 1 (vertical bars indicate standard deviation)

## Winter and summer seasons

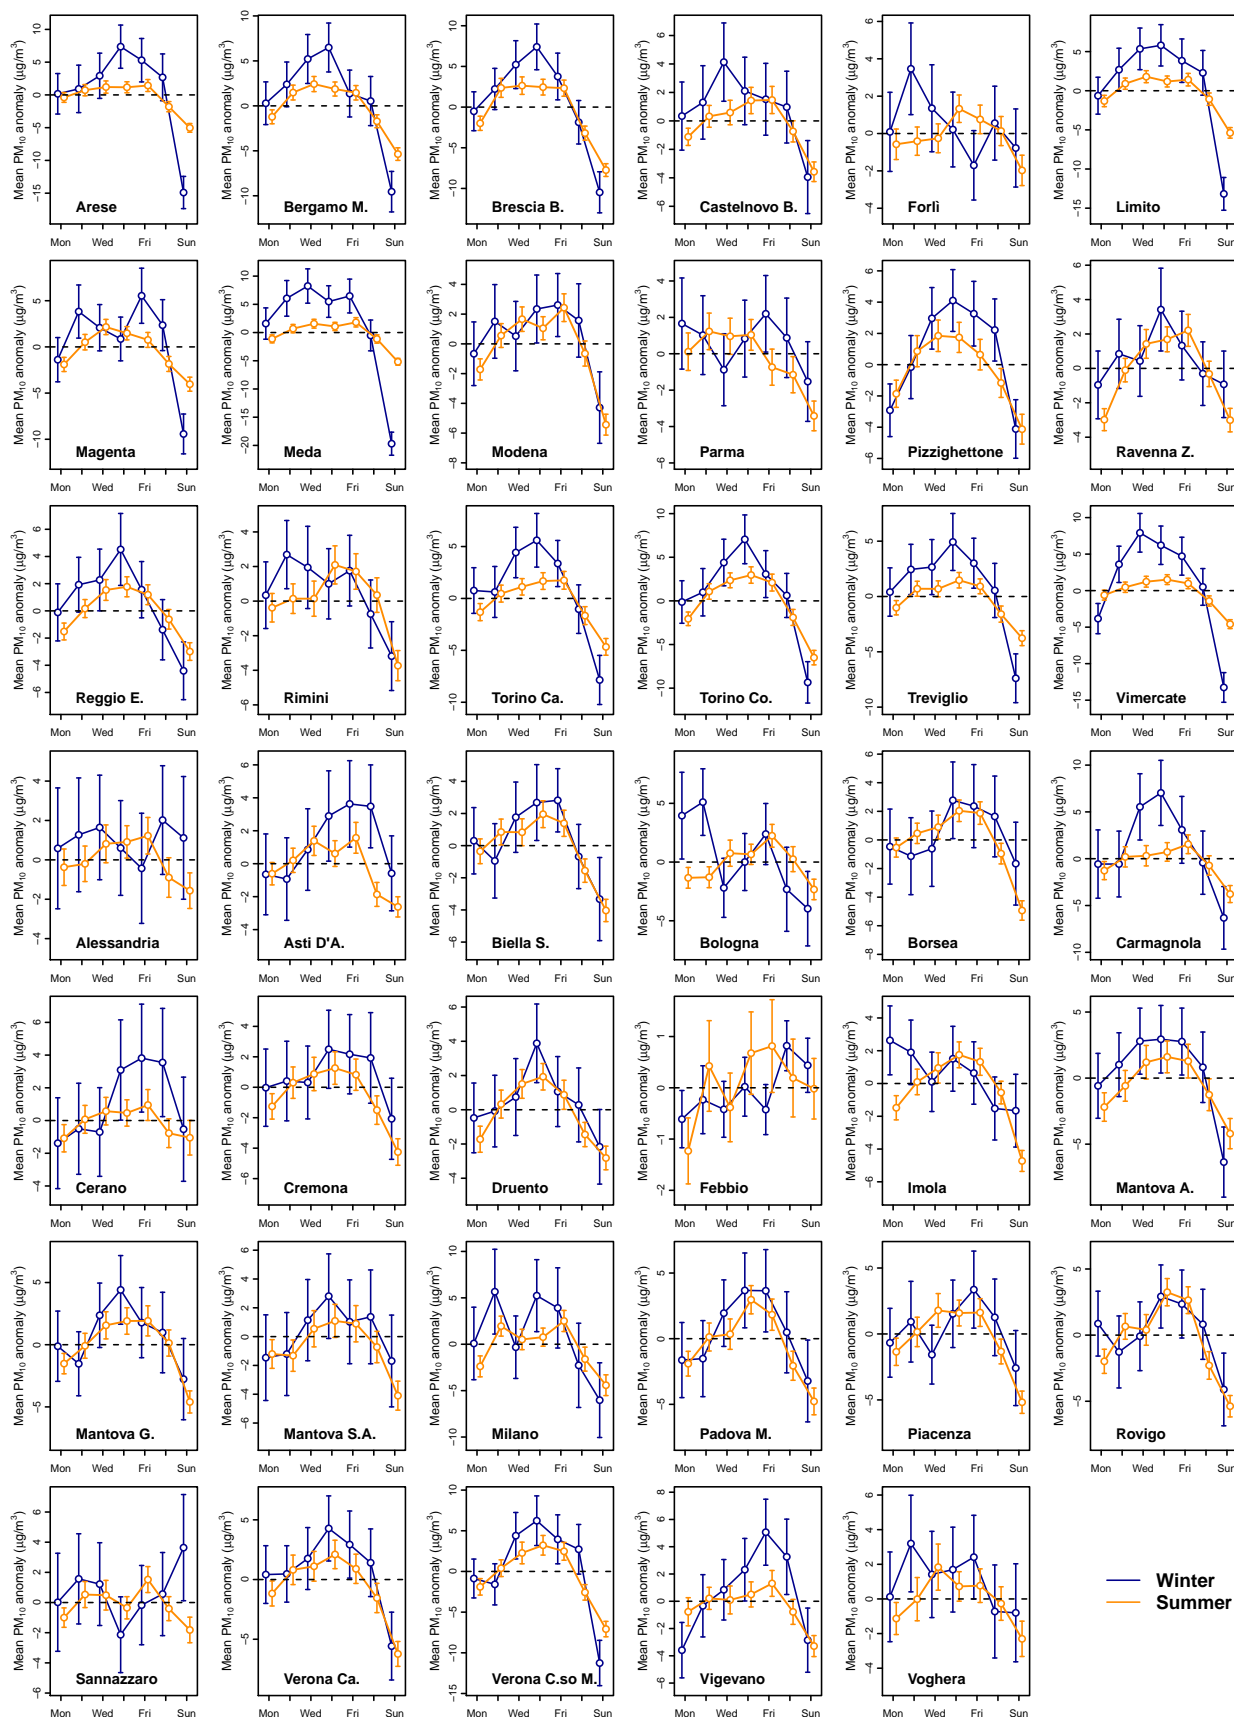

Figure S3: 7 day week mean  $PM_{10}$  anomaly for winter and summer seasons for all sites listed in table 1 (vertical bars indicate standard deviation)

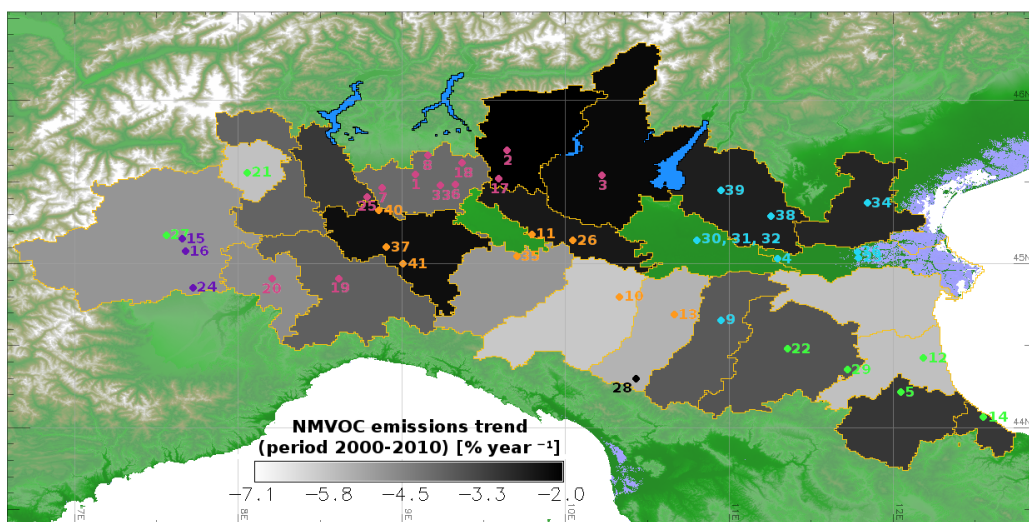

(a)

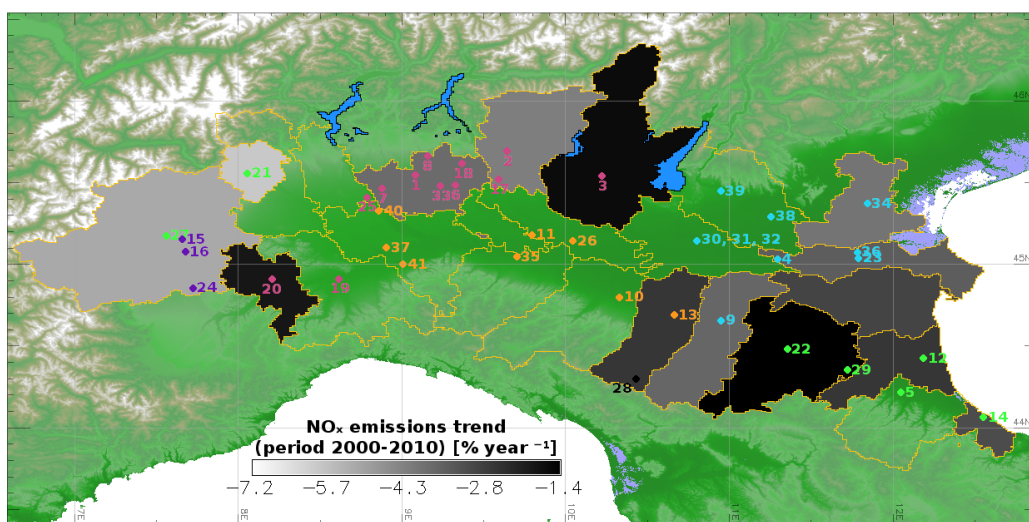

(b)

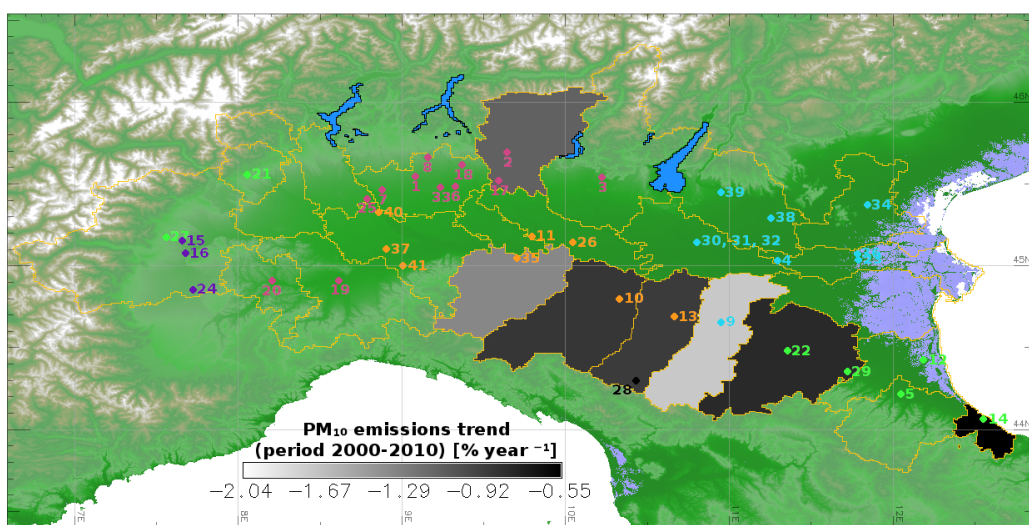

(c)

Figure S4: Significant annual trend in total emissions of NM-VOC (a), NO<sub>x</sub> (b) and PM<sub>10</sub> (c)

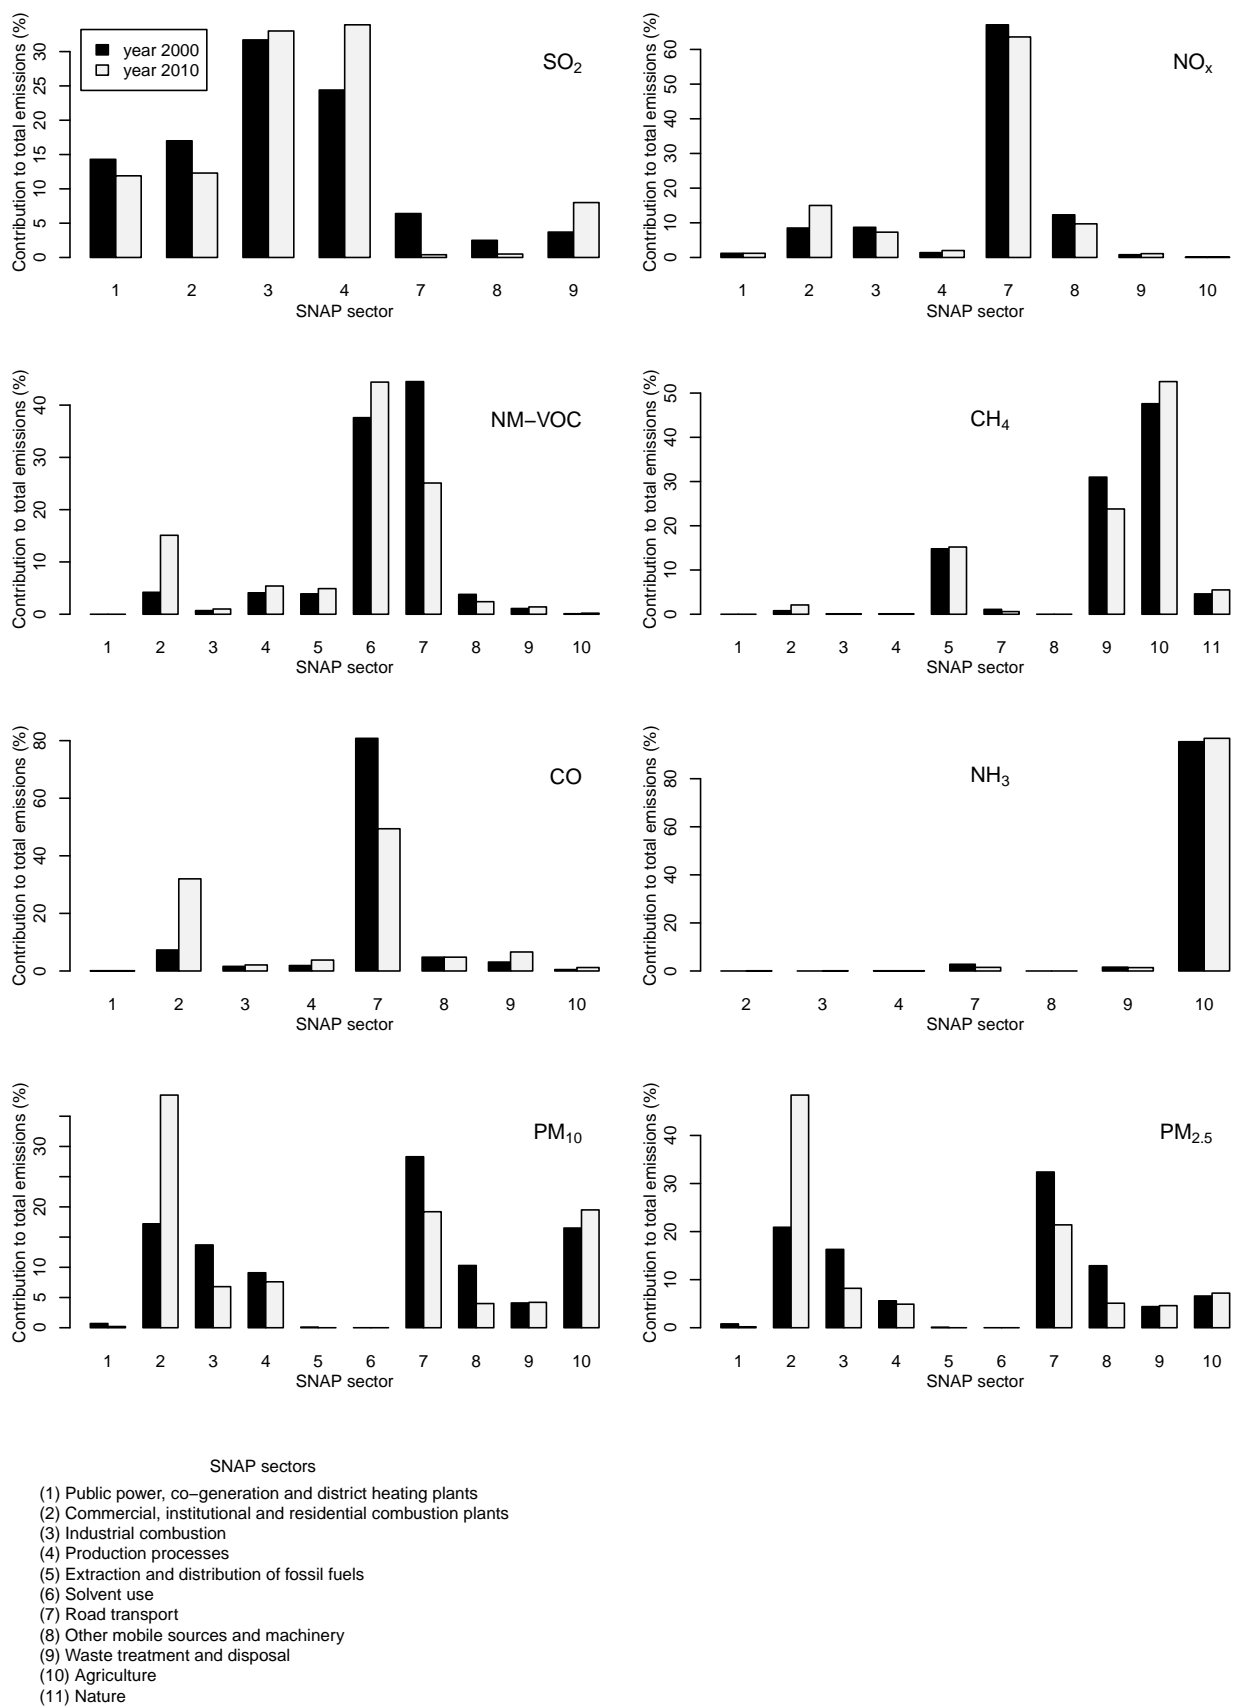

Figure S5: Change in percent contribution by each SNAP sector to the emission of 8 atmospheric pollutants in the Po valley (period 2000-2010).
